# Supplementary material for: Viscosity effect on the strategic kinetic overgrowth of molecular crystals in various morphologies: concave and octapod fullerene crystals
Source: Royal Society of Chemistry journal article supplement (doi:10.1039/d1ra02924j), 2021-01-01
Supplement: d1ra02924j1.pdf [file d1ra02924j1.pdf]

## Supplementary Information

### **Viscosity effect on strategic kinetic overgrowth of molecular crystals in various morphologies: concave and octapod fullerene crystals**

Kwangjin Song, Jin Young Koo, and Hee Cheul Choi\*

*Department of Chemistry, Pohang University of Science and Technology (POSTECH),*

*Pohang 37673, Republic of Korea*

*E-mail: [choihc@postech.edu](mailto:choihc@postech.edu)*

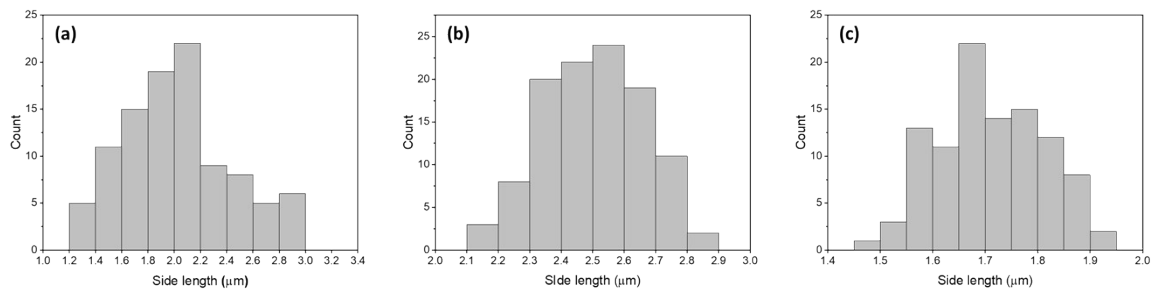

**Fig. S1** Size distributions of C<sub>70</sub> (a) cubes, (b) concave cubes, and (c) octapods.

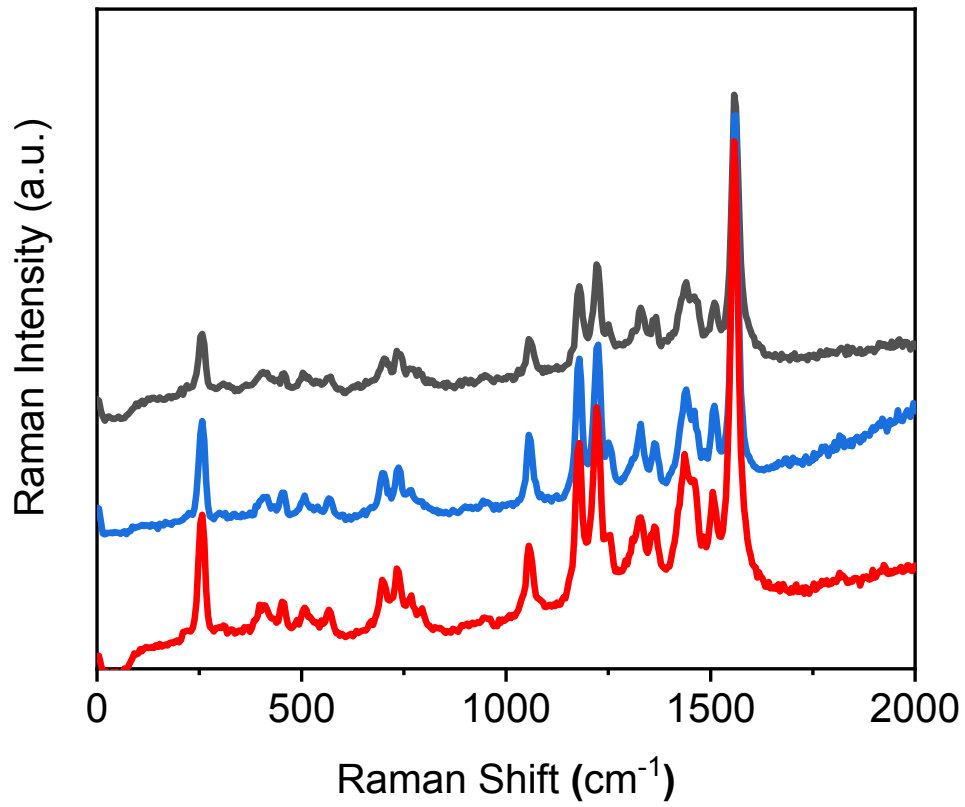

**Fig. S2** Raman spectra of C<sub>70</sub> cubes (black), concave cubes (blue), and octapods (red).

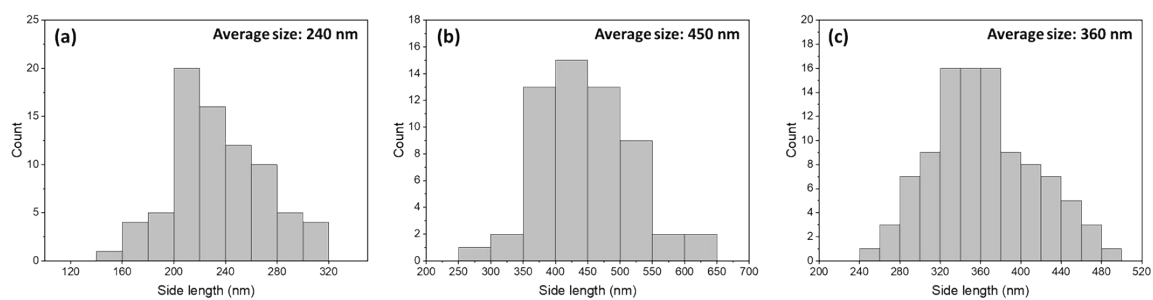

**Fig. S3** Size distributions and the average sizes of  $C_{70}$  seed crystals obtained at (a) 25°C, (b) -16°C, and (c) -78°C.

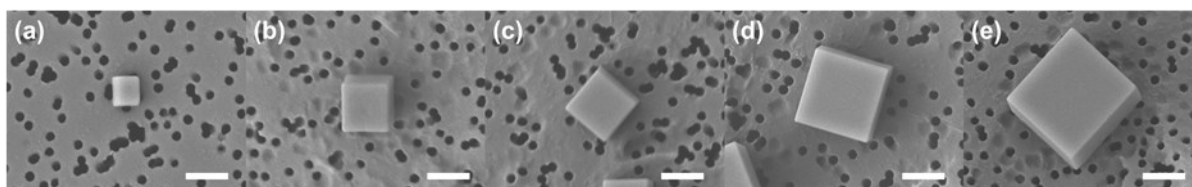

**Fig. S4** Time-dependent SEM images of  $C_{70}$  cube crystals obtained at 25°C. Growth time for each image is (a) 0 min, (b) 1 min, (c) 5 min, (d) 30 min, and (e) 3 h, respectively. (Scale bar: 1 μm)

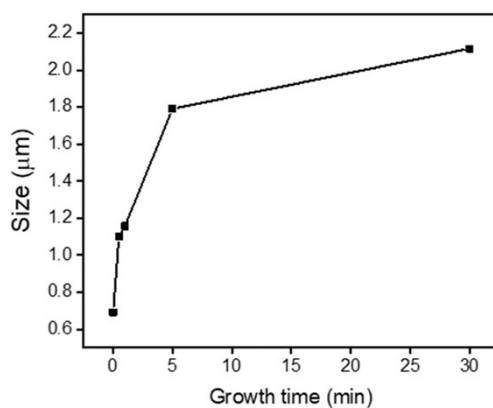

**Fig. S5** The size change of  $C_{70}$  cube crystals formed at 25°C as a function of growth time.

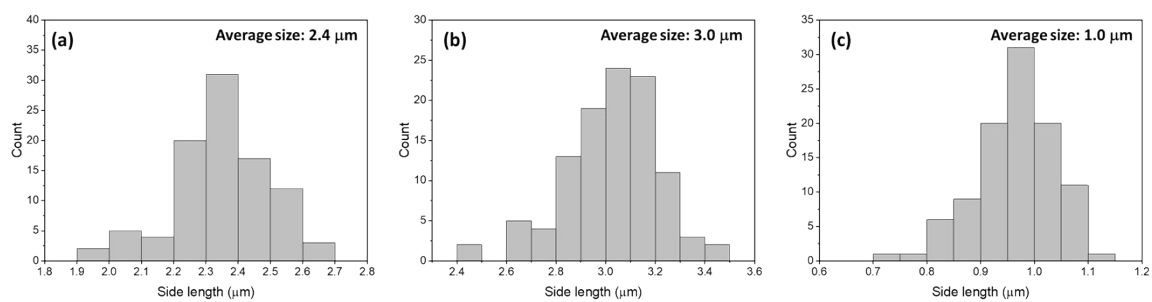

**Fig. S6** Size distributions and the average sizes of  $C_{70}$  crystals obtained using acetone as antisolvent at (a)  $25^\circ\text{C}$ , (b)  $-16^\circ\text{C}$ , and (c)  $-78^\circ\text{C}$ .

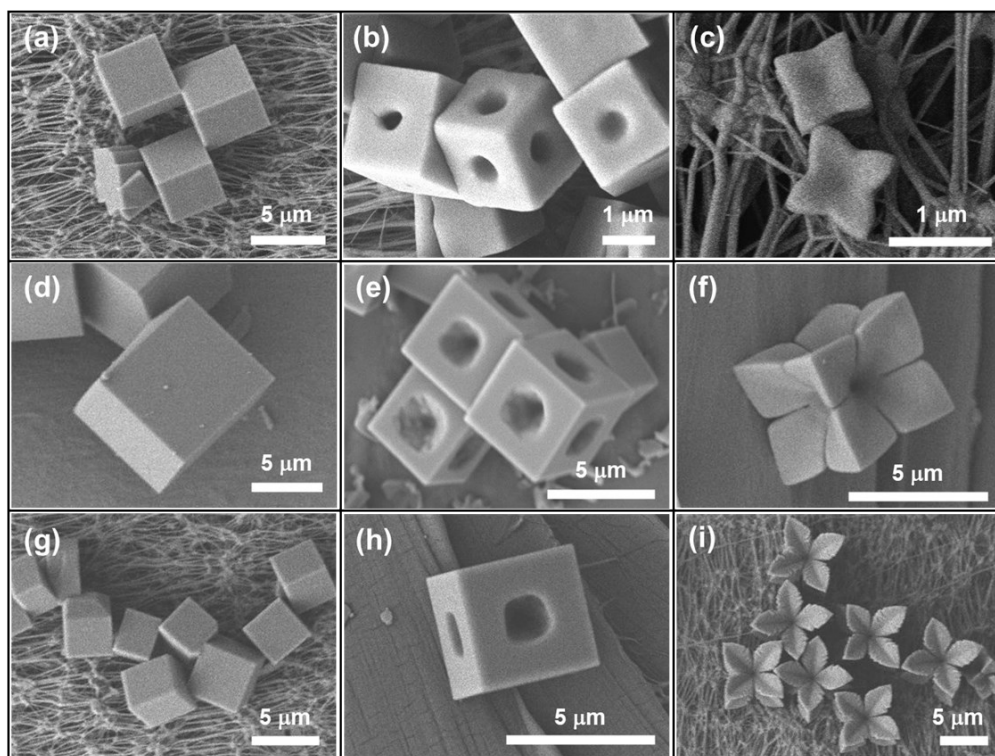

**Fig. S7** Temperature-dependent morphology of  $C_{70}$  crystals using (a-c) ethanol, (d-f) 1-propanol, and (g-i) 1-butanol as antisolvent. ASC was performed at  $25^\circ\text{C}$  (left),  $-16^\circ\text{C}$  (middle), and  $-78^\circ\text{C}$  (right), respectively.

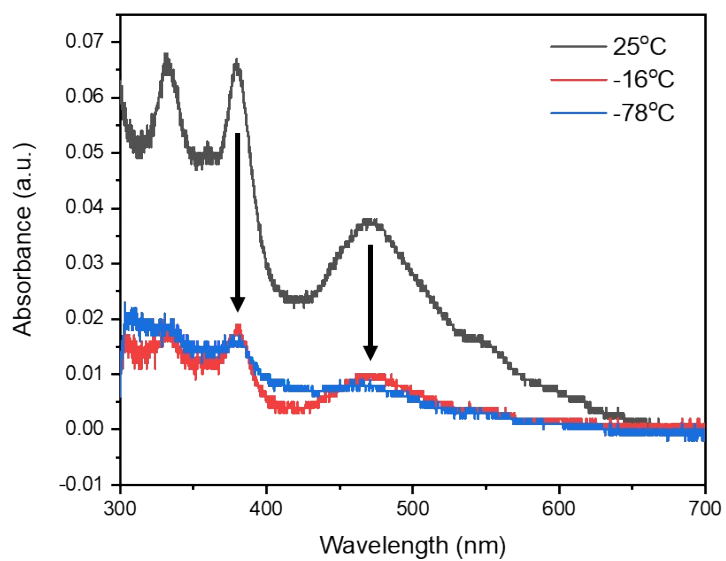

**Fig. S8** UV-VIS absorption spectra of saturated crystallization solutions at 25°C (black), -16°C (red) and -78°C (blue).
